# Supplementary material
Source: MDPI journal article supplement (https://www.mdpi.com/1424-8247/15/3/365)
Supplement: s1 [file s1]

# **Use of Early Donated COVID-19 Convalescent Plasma Is Optimal to Preserve the Integrity of Lymphatic Endothelial Cells**

## **Supplementary material**

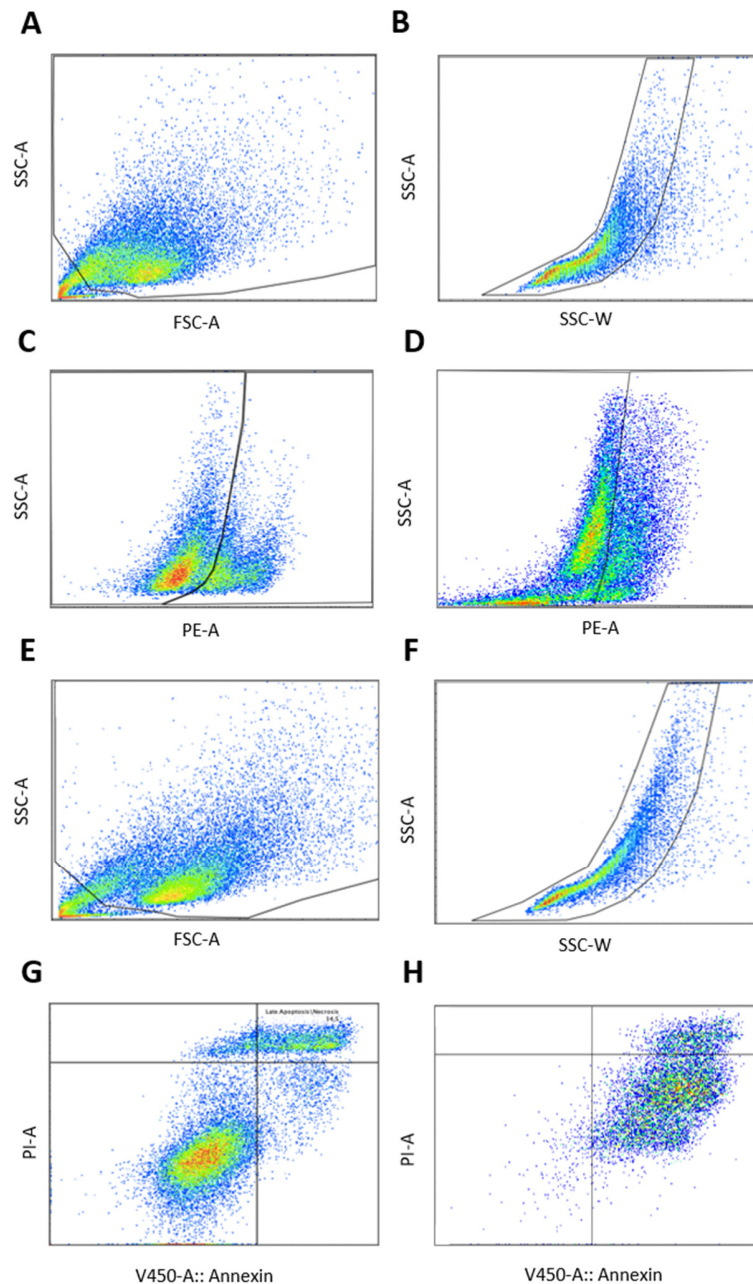

**Figure S1.** Gating strategy in flow cytometry for reactive oxygen species production and cellular viability. **(A – D).** MitoSOX™ Red gating strategy through viable cells (side scatter-area) **(A)**, single cells (side scatter-area) **(B)** MitoSOX™ Red negative and positive populations following incubation with CCP (side scatter-area) **(C)** and MitoSOX™ Red negative and positive populations following incubation with 1mM H<sub>2</sub>O<sub>2</sub> (side scatter-area) **(D)**. **(E – H)** Cellular viability gating strategy using Annexin V and PI through viable cells (side scatter-area) **(E)**, single cells (side scatter-area) **(F)** early apoptosis population (Annexin V positive and negative for PI) and necrosis (Annexin V positive and PI positive) following incubation with CCP (PI - area) **(G)** and MitoSOX™ Red negative and positive

populations following incubation with 1  $\mu$ M Staurosporine (side scatter-area) (**H**). SSC-A, side scatter-area; FSC-A, forward scatter-area; PI, propidium iodide; CCP, COVID-19 convalescent plasma.

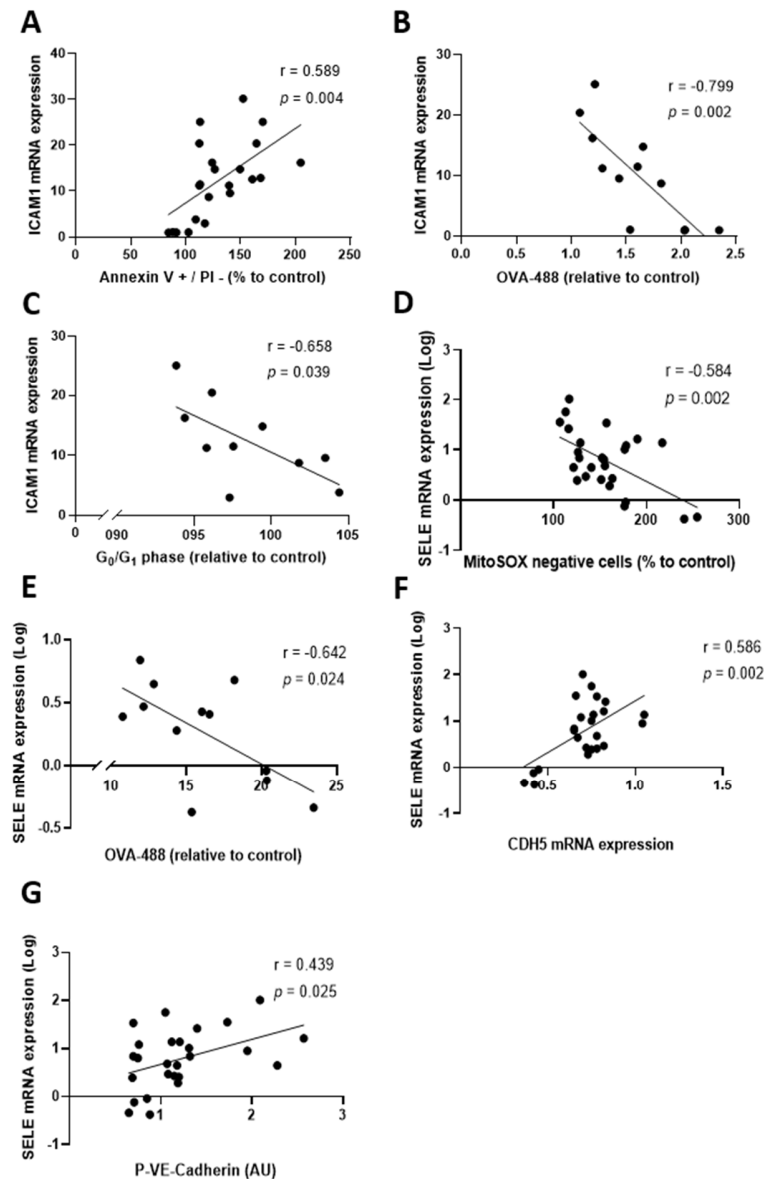

**Figure S2.** Endothelial activation markers are predictors of preserved endothelial integrity. (A – C) Treated aHDLEC (convalescent plasma for 4h and cytokines for 20h) were harvested and mRNA expression of activation marker *ICAM1* was assessed by RT-qPCR and correlated with cells in early apoptosis (positive for Annexin V and negative for propidium iodide (PI) (A), concentration of ovalbumin-488 following the permeability transwell test (B) and cells in the G<sub>0</sub>/G<sub>1</sub> phase of the cell cycle, determined by DNA fragmentation using PI (C). (D – G). Treated aHDLEC were harvested and mRNA expression of activation marker E-selectin (*SELE*) was determined by RT-qPCR and correlated with cells not labeled by the MitoSOX<sup>TM</sup> Red probe (D), concentration of ovalbumin-488 (E), VE-Cadherin mRNA expression (F) and phosphorylated VE-Cadherin expression measured by immunoblot and normalized to the expression of non-phosphorylated VE-Cadherin (G). Significance was determined by a Pearson correlation

and  $p < 0,05$  was considered significant. *ICAM1*, gene coding for intercellular adhesion molecule 1; *SELE*, gene coding for E-selectin; PI, propidium iodide; *CDH5*, gene coding for VE-Cadherin; OVA, ovalbumin; P-VE-Cadherin, phosphorylated VE-Cadherin; aHDLEC, adult human dermal lymphatic endothelial cells.

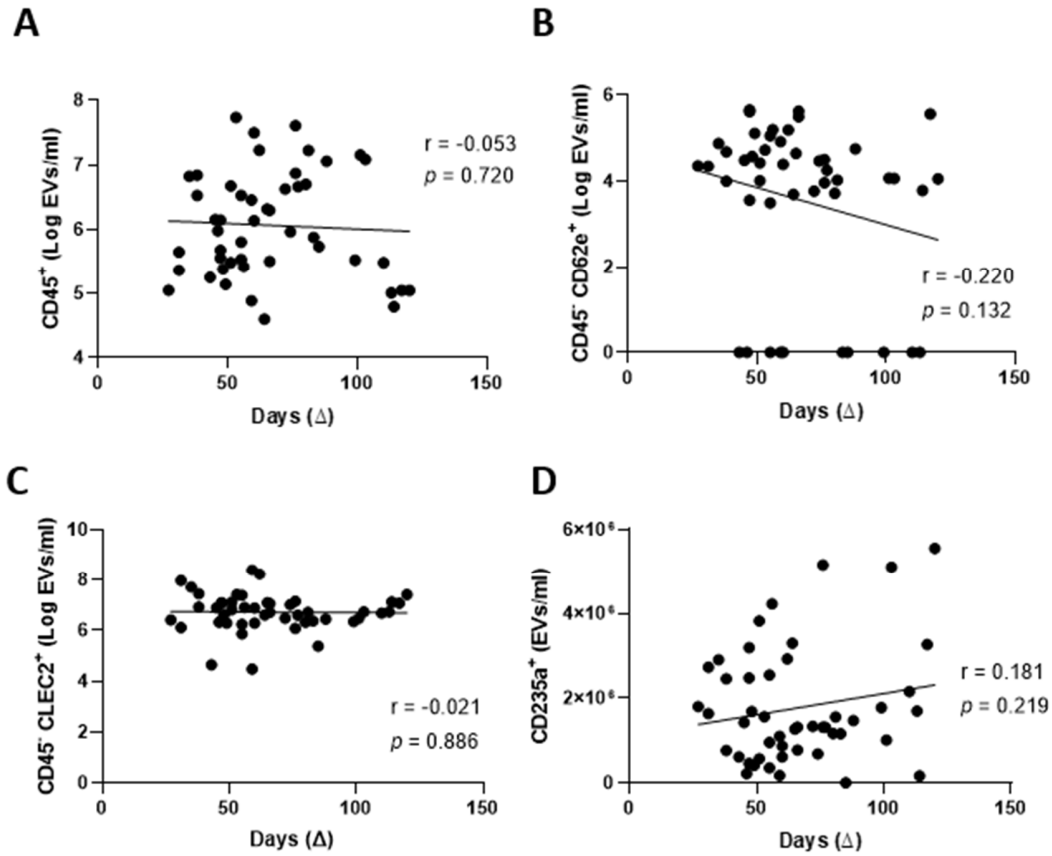

**Figure S3.** No significant correlations between extracellular vesicles and time of donation of COVID-19 convalescent plasma. (A – D) Correlation between the duration between the onset of symptoms and the donation and the concentration of CD45<sup>+</sup> EVs (A), CD45<sup>+</sup> CD62e<sup>+</sup> EVs (B), CD45<sup>-</sup> CLEC2<sup>+</sup> EVs (C) and CD235a<sup>+</sup> EVs in CCP (D). Significance was determined by a Pearson correlation after a logarithmic transformation of CD45<sup>+</sup> EVs, CD45<sup>-</sup> CD62e<sup>+</sup> EVs and CD45<sup>-</sup> CLEC2<sup>+</sup> EVs concentration to reach a normal distribution.  $p < 0,05$  was considered significant.  $\Delta$ , time of donation since onset of symptoms; EVs, extracellular vesicles; CLEC2, C-type lectin-like type II; CCP, COVID-19 convalescent plasma.

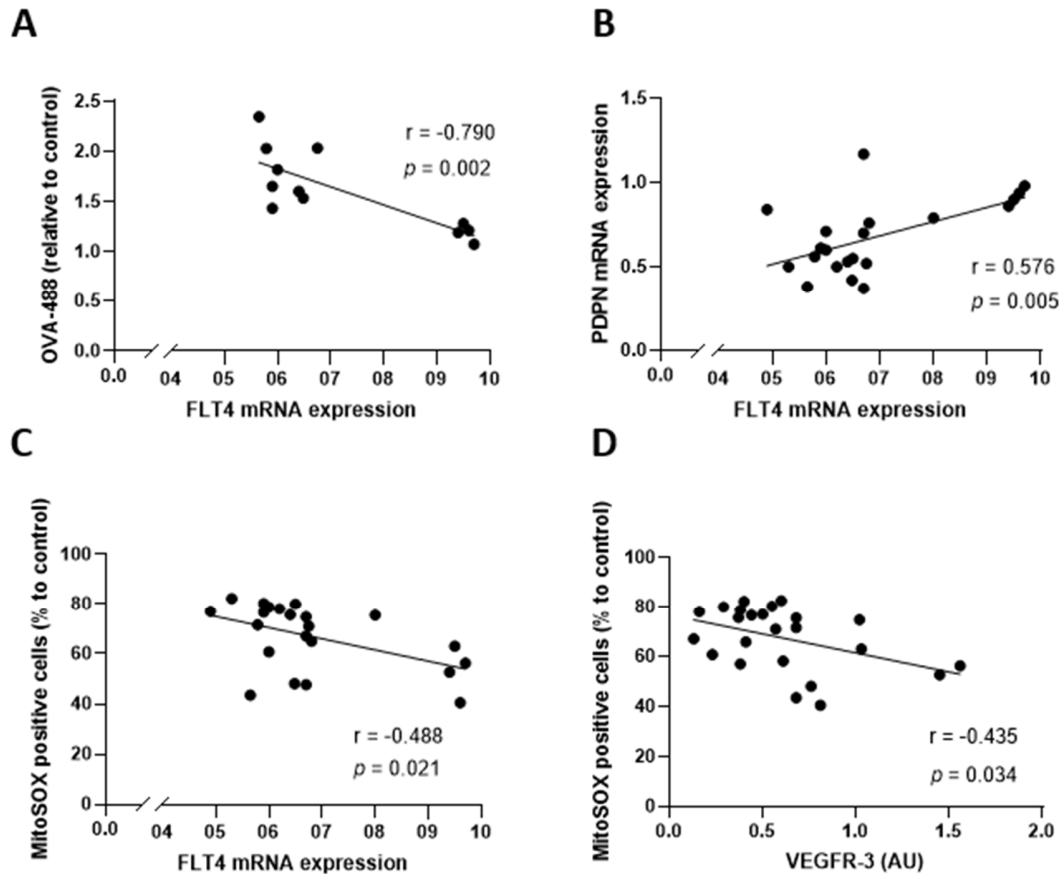

**Figure S4.** VEGFR-3 mRNA expression correlates to a preserved endothelial integrity. (A) Treated cells (convalescent plasma for 4h and cytokines for 20h) were harvested and mRNA expression of *FLT4* was assessed by RT-qPCR and correlated with the concentration of ovalbumin-488 measured following the permeability transwell assay. (B) The mRNA expression of FLT-4 was correlated with the mRNA expression of podoplanin in treated cells (C) The mRNA expression of FLT4 was correlated with cells labeled by the MitoSOX<sup>TM</sup> Red probe (relative to cells treated with control plasma) (D) Proteins from treated cells were extracted and the expression of VEGFR-3 was assessed by immunoblot and correlated with cells labeled by the MitoSOX<sup>TM</sup> Red probe (relative to cells treated with control plasma). Significance was determined by a Pearson correlation and  $p < 0,05$  was considered significant. OVA, ovalbumin; FLT4, gene coding for VEGFR-3; VEGFR-3, vascular endothelial growth factor receptor 3; PDPN; gene coding for podoplanin.

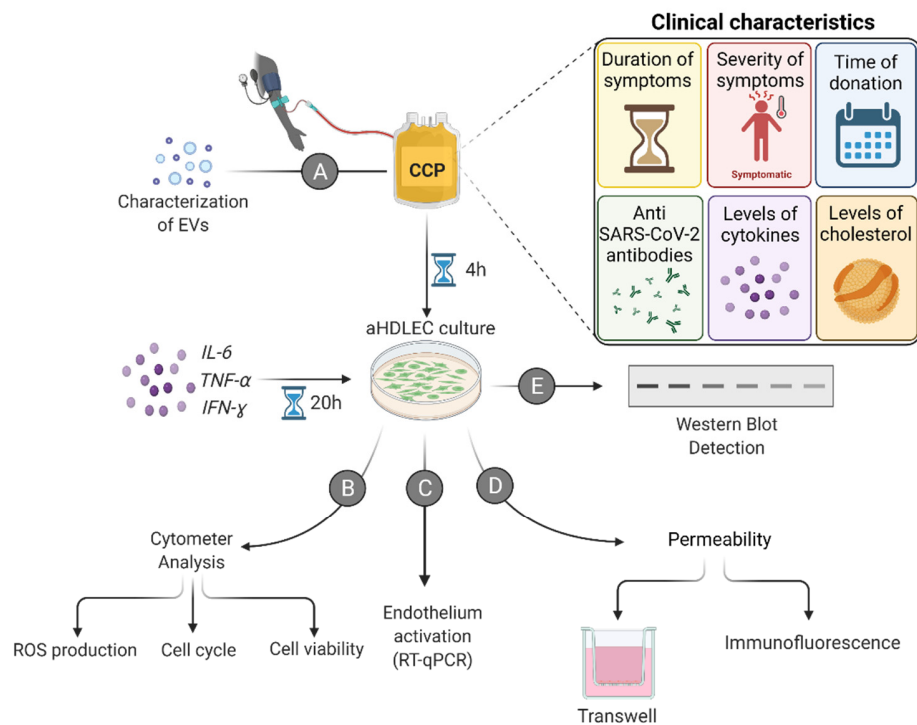

**Figure S5.** Experimental design. (A – E) Clinical characteristic of COVID-19 convalescent plasma donors were assessed. EVs within CCP were characterized (A). Following the incubation of CCP on aHDEC, cells were treated with a pro-inflammatory cocktail of cytokines (IFN $\gamma$  [10 ng/ml], IL-6 [20 ng/ml] and TNF $\alpha$  [20 ng/ml]). Flow cytometry analysis for cell viability, mitochondrial ROS production and cell cycle were performed (B). Endothelial activation (C), permeability (D), and protein expression (E) were also analyzed. CCP, COVID-19 convalescent plasma; EVs, extracellular vesicles; aHDEC, adult human dermal lymphatic endothelial cells; ROS, reactive oxygen species; IFN $\gamma$ , interferon gamma; IL-6, interleukin 6; TNF $\alpha$ , tumor necrosis factor alpha. *Created with BioRender.com*



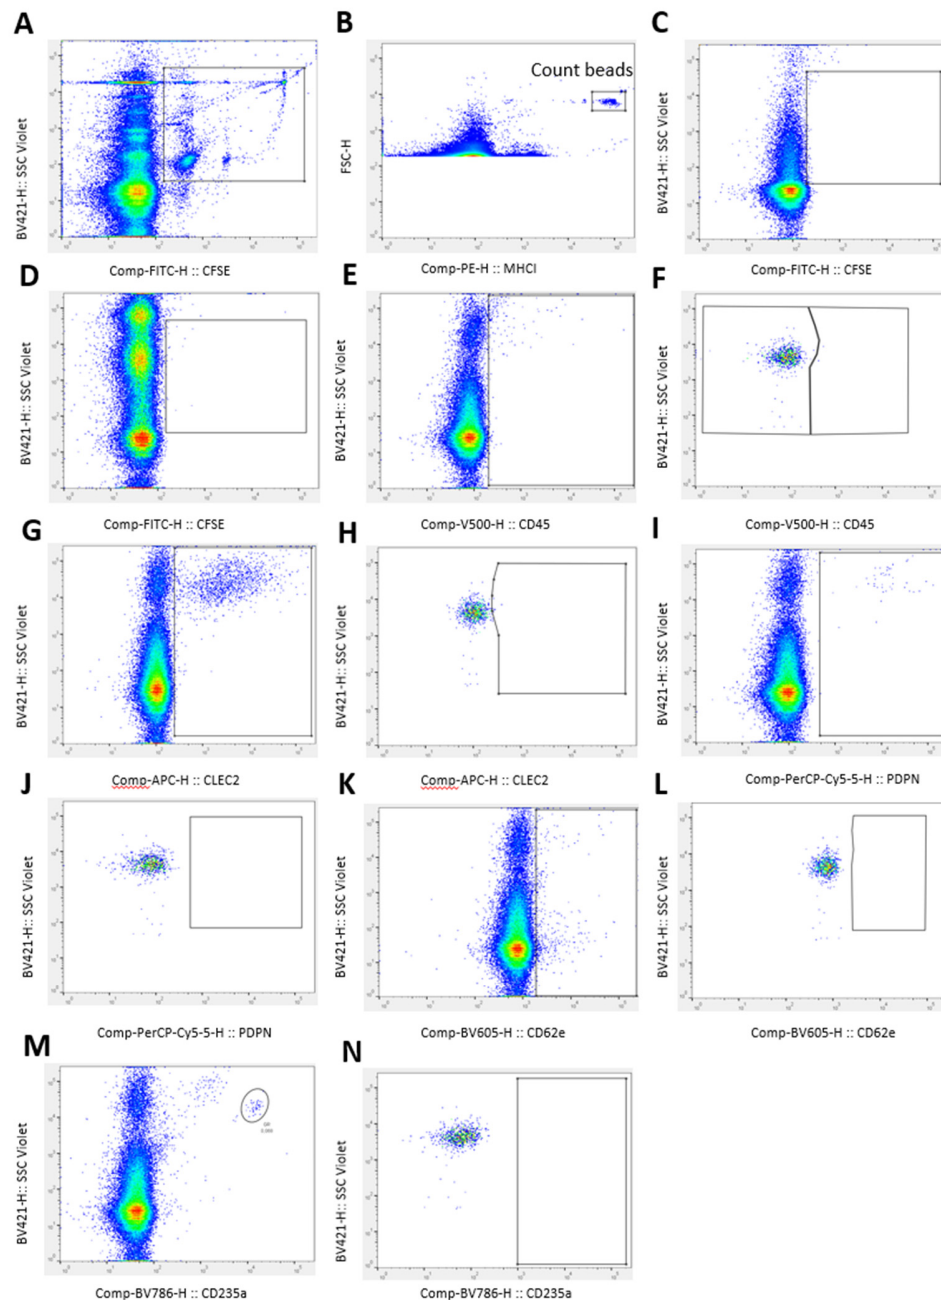

**Figure S6.** Flow cytometry plots gating for the identification of extracellular vesicles. **(A)** Megamix (180- to 1300-nm silica beads and 110- and 500-nm fluorescent latex Apogee beads) and filter of 405/40 gated with CFSE (side scatter-height). **(B)** Count Beads (3- $\mu$ m-diameter MP-CB) (forward scatter-height). **(C)** Background sample used to eliminate background noise (side scatter-height). **(D)** Unlabeled sample used as unstained sample for gating strategy (side scatter-height). Single stained samples were used for gating strategy. As controls, detergent Triton X-100 was added to the antibody mix to verify the membrane of EVs. Single stained **(E)** and depletion using Triton X-100 **(F)** of CD45<sup>+</sup> EVs. Single stained **(G)** and depletion **(H)** of CLEC2<sup>+</sup> EVs. Single stained **(I)** and depletion **(J)** of

podoplanin<sup>+</sup> EVs. Single stained (**K**) and depletion (**L**) of CD62e<sup>+</sup> EVs. Single stained (**M**) and depletion (**N**) of CD235a<sup>+</sup> EVs. SSC, side scatter; FSC-H, forward scatter-height; CFSE, carboxyfluorescein succinimidyl ester; MHCI, major histocompatibility complex I; PDPN, podoplanin; CLEC2, C-type lectin-like type II; EVs, extracellular vesicles.

Table S1 List of conjugated antibodies and markers used for flow cytometry

| Antibodies/<br>Proteins | Fluoro.     | Excitation<br>(nm) | Emission<br>(nm) | Company                                             | Catalogue      | Dilution or<br>Conc. |
|-------------------------|-------------|--------------------|------------------|-----------------------------------------------------|----------------|----------------------|
| CFSE                    | FITC        | 488                | 530/30           | Cedarlane,<br>Burlington,<br>Ontario,<br>Canada,    | S8269-<br>10MG | 1/5000               |
| MHC I                   | PE          | 488                | 575/25           | BD<br>Biosciences,<br>Franklin<br>Lakes, NJ,<br>USA | 555553         | 1/200                |
| CD235a                  | BV786       | 405                | 780/60           | BD<br>Biosciences,<br>Franklin<br>Lakes, NJ,<br>USA | 740984         | 1/500                |
| CD45                    | V500        | 405                | 525/50           | BD<br>Biosciences,<br>Franklin<br>Lakes, NJ,<br>USA | 560777         | 1/100                |
| CLEC2                   | APC         | 640                | 670/30           | BioLegend,<br>San Diego,<br>CA, USA                 | 372005         | 1/50                 |
| CD62e                   | BV605       | 405                | 610/20           | BD<br>Biosciences,<br>Franklin<br>Lakes, NJ,<br>USA | 563359         | 1/75                 |
| Podoplanin              | PerCP-Cy5.5 | 488                | 695/40           | BioLegend,<br>San Diego,<br>CA, USA                 | 337011         | 1/100                |
| Annexin V               | V450        | 405                | 450/40           | BD<br>Biosciences,                                  | 560506         | 1µL/test             |

|                         |     |        |                                          |                |          |
|-------------------------|-----|--------|------------------------------------------|----------------|----------|
|                         |     |        | Franklin<br>Lakes, NJ,<br>USA            |                |          |
| <b>PI*</b>              | 488 | 610/20 | Biotium,<br>Fremont,<br>CA, USA          | 40017          | 2,5µg/mL |
| <b>PI**</b>             | 488 | 610/20 | Sigma, St.<br>Louis,<br>Missouri,<br>USA | P4170-<br>25MG | 50µg/mL  |
| <b>MitoSOX™<br/>Red</b> | 510 | 575/25 | Thermo<br>Fisher,<br>Waltham,<br>MA, USA | M36008         | 1,67µM   |

Fluoro, fluorochrome; Conc, concentration; CFSE, carboxyfluorescein succinimidyl ester; MHC I, major histocompatibility complex I; CLEC2, C-type lectin-like type II; PI\*, propidium iodide used for cell viability; PI\*\*, propidium iodide used for cell cycle distribution.

Table S2 List of sequences for PCR primers used throughout the study

| Genes        | Primers Sequence (5' → 3')                              |
|--------------|---------------------------------------------------------|
| <i>ACTB</i>  | F : GACGACATGGAGAAAATCTG<br>R : ATGATCTGGGTCATCTTCTC    |
| <i>ICAM1</i> | F : ACCATCTACAGCTTTCCG<br>R : TCACACTTCACTGTCACC        |
| <i>SELE</i>  | F : GAGAATTCACCTACAAGTCC<br>R : AGGCTTGAACATTTTACCAC    |
| <i>FLT4</i>  | F : GAGCAGATAGAGAGCAGGCAT<br>R : ACATTCTGGCCAGGTCCTTTAC |
| <i>PDPN</i>  | F : AAGATGGTTTGTCAACAGTG<br>R : GTACCYYCCCGACATTTTTC    |
| <i>CDH5</i>  | F : CGCAATAGACAAGGACATAAC<br>R : TATCGTGATTATCCGTGAGG   |

F, forward; R, reverse; *ACTB*, gene coding for  $\beta$ -actin; *ICAM1*, gene coding for intercellular adhesion molecule 1; *SELE*, gene coding for E-selectin; *FLT4*, gene coding for vascular endothelial growth factor receptor 3; *PDPN*, gene coding for podoplanin; *CDH5*, gene coding for VE-Cadherin.

Questionnaire

**Multicentre Study to Evaluate the Safety and Efficacy of Convalescent Plasma in the Treatment of COVID-19: Convalescent Plasma Donor Component.**

|                                     |                                                                                                               |
|-------------------------------------|---------------------------------------------------------------------------------------------------------------|
| <b>Participant ID number</b>        | _____                                                                                                         |
| <b>Origin of infection</b>          |                                                                                                               |
| Travel abroad                       | <input type="checkbox"/>                                                                                      |
| Community transmission              | <input type="checkbox"/>                                                                                      |
| Unknown                             | <input type="checkbox"/>                                                                                      |
| <b>Symptoms</b>                     |                                                                                                               |
| Date of onset of symptoms           | ____/____/____                                                                                                |
| Date of positive test result        | ____/____/____                                                                                                |
| End date of symptoms                | ____/____/____                                                                                                |
| <b>Symptoms: types and severity</b> |                                                                                                               |
| Overall health condition            | <input type="checkbox"/> Fever<br><input type="checkbox"/> Fatigue                                            |
| Respiratory                         | <input type="checkbox"/> Cough<br><input type="checkbox"/> Difficulty breathing                               |
| Digestive                           | <input type="checkbox"/> Nausea<br><input type="checkbox"/> Stomach ache<br><input type="checkbox"/> Diarrhea |
| ENT                                 | <input type="checkbox"/> Loss of smell/taste<br><input type="checkbox"/> Nasal congestion                     |
| Severity of symptoms                | <input type="checkbox"/> Mild<br><input type="checkbox"/> Moderate<br><input type="checkbox"/> Strong         |

| Hospitalization                                                                                                                                                                                     |                                                                                                                                                                          |
|-----------------------------------------------------------------------------------------------------------------------------------------------------------------------------------------------------|--------------------------------------------------------------------------------------------------------------------------------------------------------------------------|
| <p>Were you hospitalized for COVID-19?</p> <p>If you answered Yes :</p> <p style="text-align: right;">Date of hospitalization</p> <p style="text-align: right;">Date of discharge from hospital</p> | <p><input type="checkbox"/> Yes</p> <p><input type="checkbox"/> No</p> <p style="text-align: right;">____/____/____</p> <p style="text-align: right;">____/____/____</p> |
| Intensive Care                                                                                                                                                                                      |                                                                                                                                                                          |
| <p>Were you admitted to intensive care?</p> <p>If yes, how many days were you in intensive care?</p>                                                                                                | <p><input type="checkbox"/> Yes</p> <p><input type="checkbox"/> No</p> <p>_____</p>                                                                                      |
| <p>Did you require mechanical ventilation/Were you intubated?</p>                                                                                                                                   | <p><input type="checkbox"/> Yes</p> <p><input type="checkbox"/> No</p>                                                                                                   |
| Post-test                                                                                                                                                                                           |                                                                                                                                                                          |
| <p>Were you tested for the virus after symptoms ceased/disappeared?</p> <p>If yes, what was the result of this test?</p>                                                                            | <p><input type="checkbox"/> Yes</p> <p><input type="checkbox"/> No</p> <hr/> <p><input type="checkbox"/> Positive</p> <p><input type="checkbox"/> Negative</p>           |
| <p><b>Completed by:</b></p> <p>_____</p>                                                                                                                                                            | <p><b>DATE :</b></p> <p>____/____/____</p> <p><b>DATE:</b></p> <p>____/____/____</p>                                                                                     |
